# Supplementary material for: Formation of a 2D supramolecular water framework via metal–organic unit templating
Source: Royal Society of Chemistry journal article supplement (doi:10.1039/b915253a), 2009-10-15
Supplement: b915253a.pdf [file b915253a.pdf]

## Formation of a 2D Supramolecular Water Framework via Metal-Organic Unit Templating

Qing-Guo Meng,<sup>1,2</sup> Si-Tang Yan,<sup>1</sup> Xiu-Li Yang<sup>1</sup> and Chuan-De Wu<sup>1\*</sup>

Department of Chemistry, Zhejiang University, Hangzhou 310027, P. R. China

Microscale Science Institute, Department of Chemistry and Chemical Engineering,  
Weifang University, Weifang 261061, P. R. China

Email: [cdwu@zju.edu.cn](mailto:cdwu@zju.edu.cn)

### Experimental Section

**Materials and Methods.** All of the chemicals were obtained from commercial sources and used without further purification. The determinations of the unit cell and data collection for the crystal of compound **1** were performed on a Siemens SMART CCD APEX II. The data were collected using graphite-monochromatic Mo-K $\alpha$  radiation ( $\lambda = 0.71073 \text{ \AA}$ ) at 296 K. The data sets were corrected by **SADABS** program.<sup>1</sup> The structures were solved by direct methods, and refined by full-matrix least-square method with the **SHELXTL-97** program package.<sup>2</sup> H atoms on C atoms were generated geometrically. The H-atoms of the water molecule were clearly visible in a difference map and were handled in the subsequent refinement with fixed isotropic displacement parameters. The IR spectrum was recorded from KBr pellet on a FTS-40 spectrophotometer. Thermogravimetric analysis (TGA) was carried out under air on a NETZSCH STA 409 PC/PG instrument at a heating rate of 4 °C/min.

### References:

1. G. M. Sheldrick, **SADABS**; *Siemens Analytical X-ray Instrument Division*: Madison, WI, **1995**.
2. G. M. Sheldrick, *Program for Structure Refinement*: University of Göttingen, Germany, **1997**.

---

<sup>1</sup> Zhejiang University

<sup>2</sup> Weifang University

## Figures

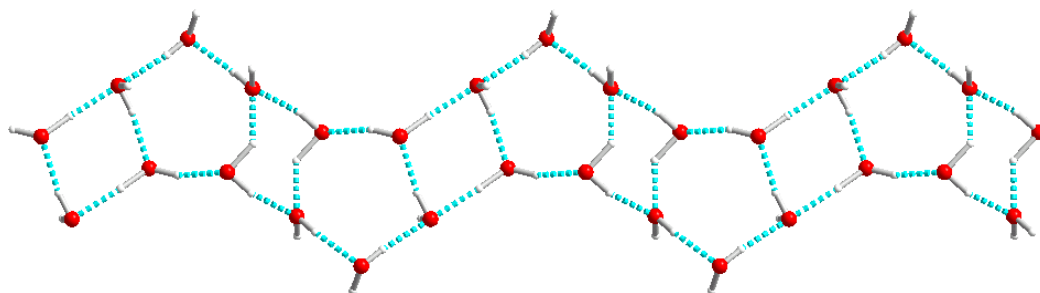

**Figure S1.** The supramolecular water tape in **1**.

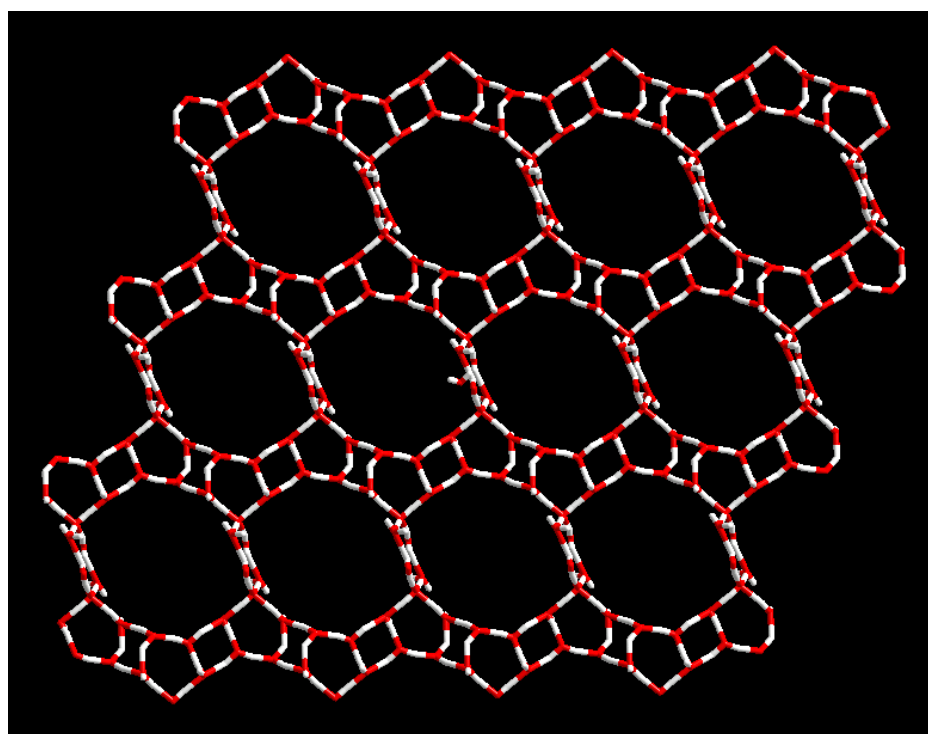

**Figure S2.** Supramolecular water layer in **1**.

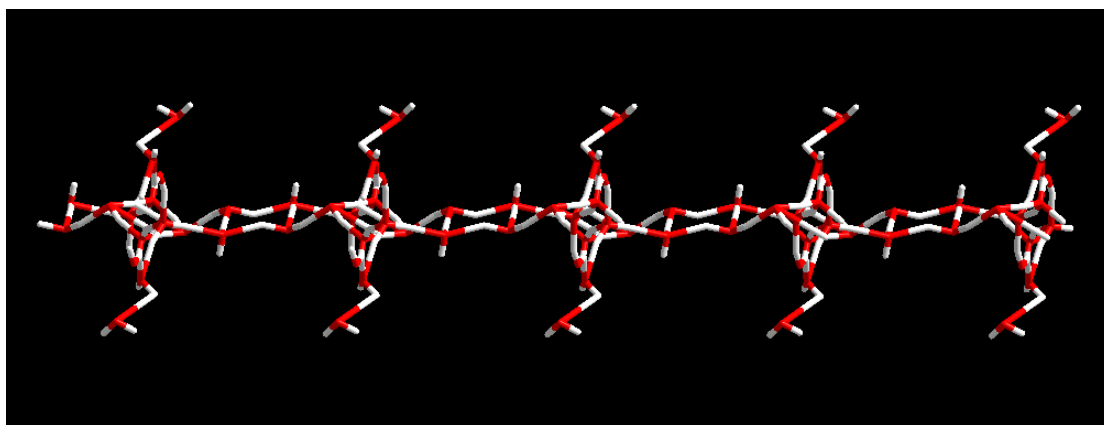

**Figure S3.** Side view of the supramolecular water layer in **1**.

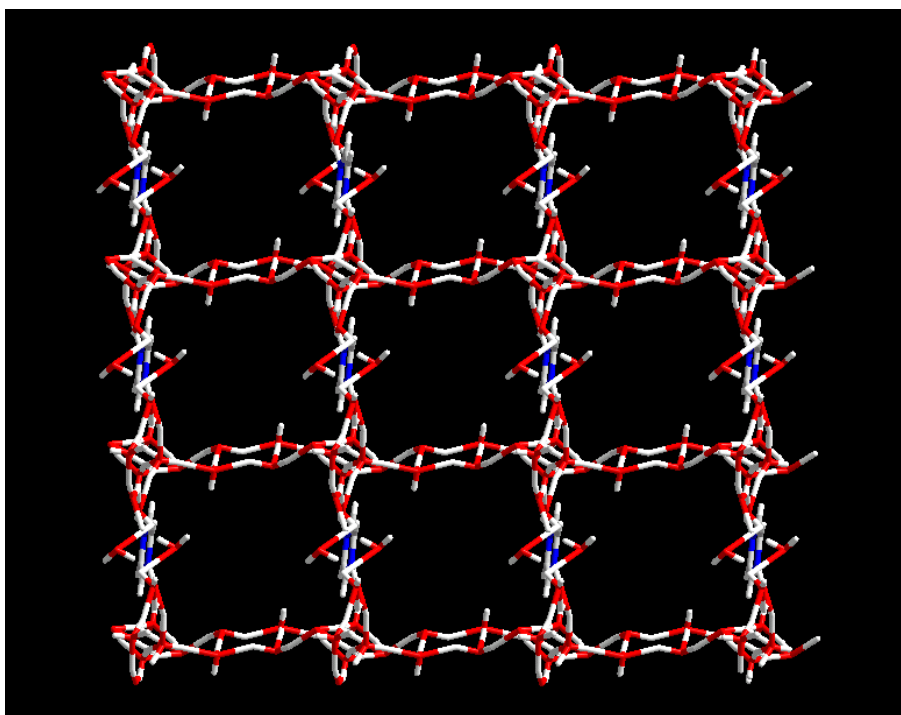

**Figure S4.** A view of the 3D supramolecular network in **1** along 1 0 1 direction.

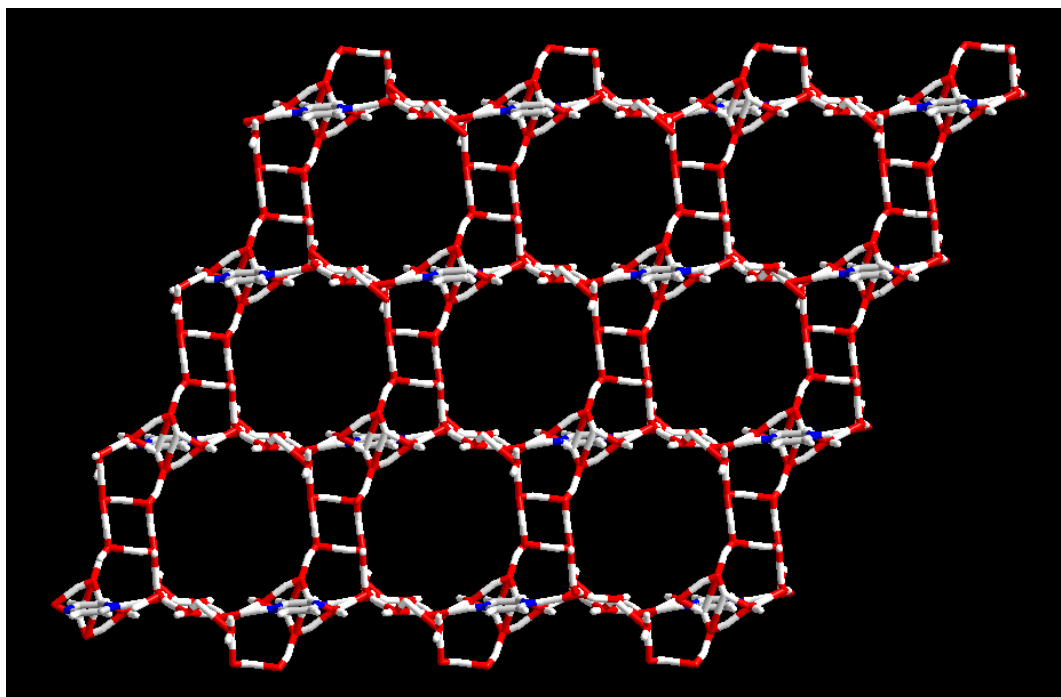

**Figure S5.** A view of the 3D supramolecular network in **1** along the *a* axis.

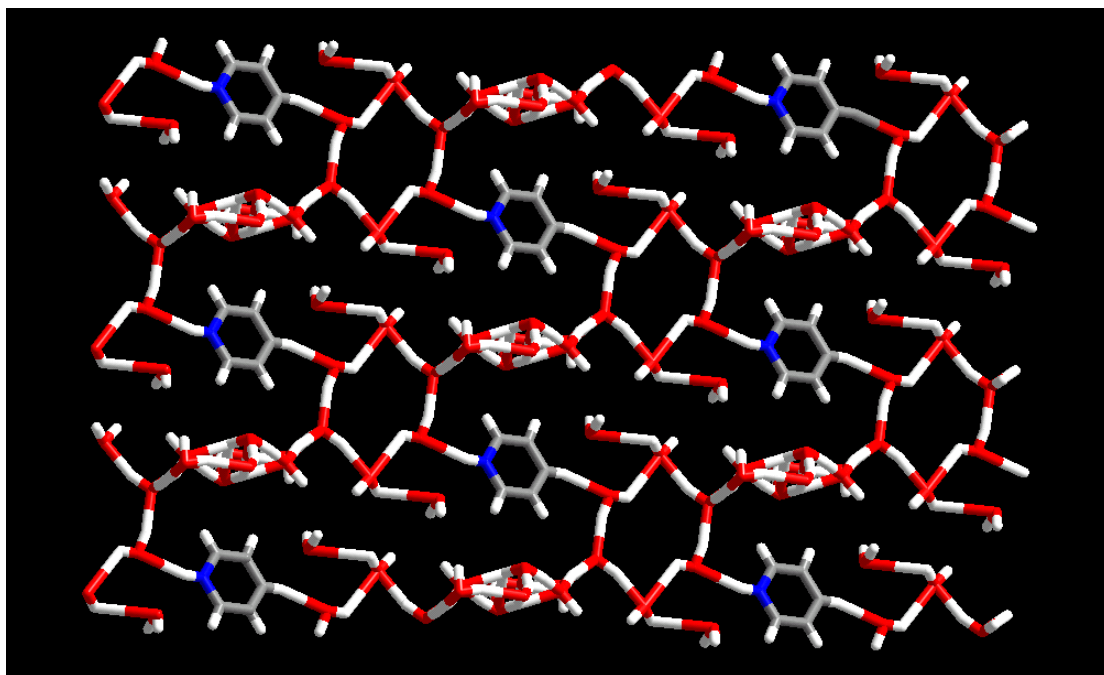

**Figure S6.** A view of the 3D supramolecular network in **1** along the *b* axis.

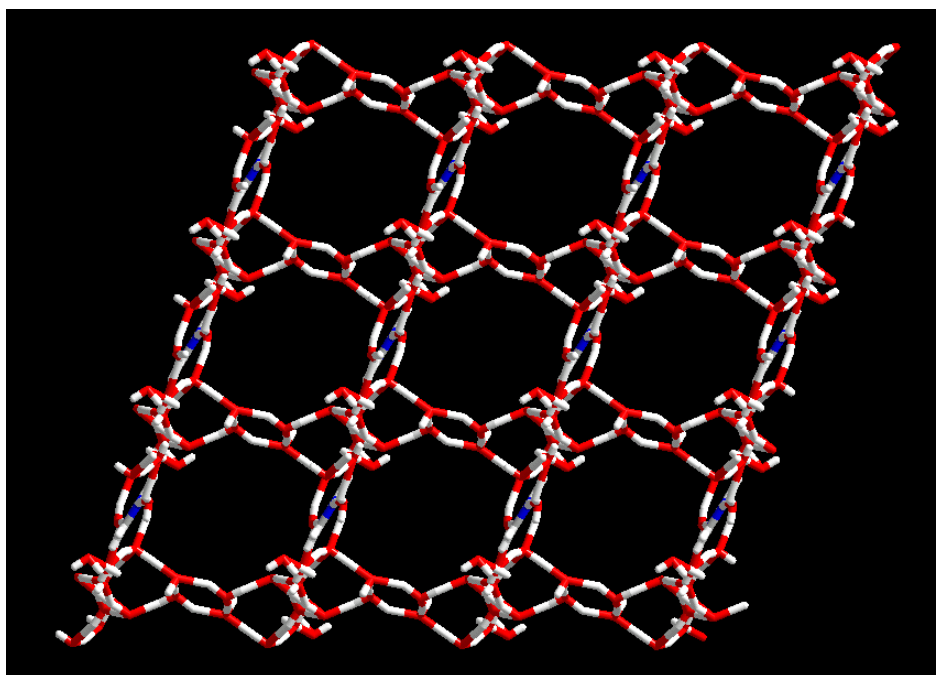

**Figure S7.** A view of the 3D supramolecular network in **1** along the *c* axis.

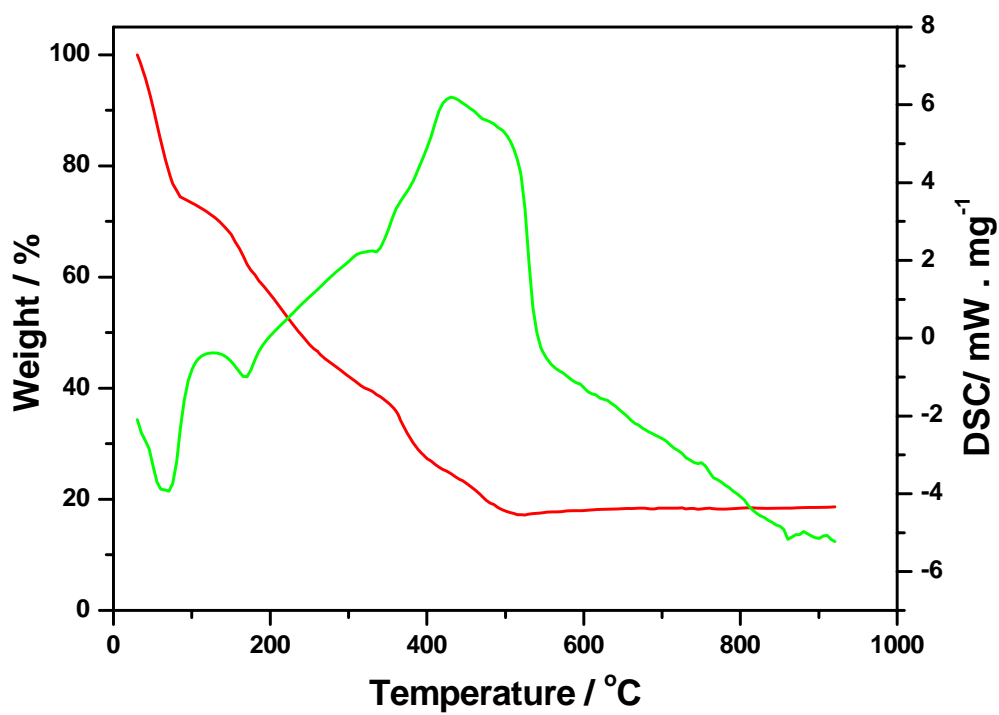

**Figure S8.** Thermogravimetric analysis curve of **1**.

## Tables

**Table S1.** Crystal data and structure refinements for compound **1**.

|                                                          | <b>1</b>                                                                       |
|----------------------------------------------------------|--------------------------------------------------------------------------------|
| Formula                                                  | C <sub>39</sub> H <sub>61</sub> N <sub>5</sub> Ni <sub>2</sub> O <sub>24</sub> |
| Formula weight                                           | 1101.35                                                                        |
| Crystal size (mm <sup>3</sup> )                          | 0.32 × 0.17 × 0.12                                                             |
| Crystal color                                            | Green                                                                          |
| Crystal system, Space group                              | triclinic, <i>P</i> -1                                                         |
| a (Å)                                                    | 10.261(1)                                                                      |
| b (Å)                                                    | 11.412(1)                                                                      |
| c (Å)                                                    | 13.314(2)                                                                      |
| α (°)                                                    | 110.27(1)                                                                      |
| β (°)                                                    | 107.37(1)                                                                      |
| γ (°)                                                    | 100.93(1)                                                                      |
| Volume (Å <sup>3</sup> )                                 | 1318.9(2)                                                                      |
| Z                                                        | 1                                                                              |
| Calculated density (g·cm <sup>-3</sup> )                 | 1.387                                                                          |
| F(000)                                                   | 578                                                                            |
| Temperature (K)                                          | 296(2)                                                                         |
| Wavelength (Å)                                           | 0.71073                                                                        |
| Absorption coefficient (mm <sup>-1</sup> )               | 0.796                                                                          |
| θ for data collection (°)                                | 1.78 to 27.72                                                                  |
| Limiting indices                                         | -13 ≤ h ≤ 13, -14 ≤ k ≤ 14,<br>-17 ≤ l ≤ 17                                    |
| Reflections collected                                    | 20611 [R(int) = 0.0651]                                                        |
| Unique reflections used for refinement                   | 6096                                                                           |
| Data / parameters                                        | 6096 / 316                                                                     |
| Goodness-of-fit on F <sup>2</sup>                        | 1.017                                                                          |
| R1 (wR2) [ <i>I</i> > 2σ( <i>I</i> )] (3837 reflections) | 0.0481 (0.1047)                                                                |
| R1 (wR2) (all data) (6096 reflections)                   | 0.0966 (0.1199)                                                                |
| Largest diff. peak and hole (e·Å <sup>-3</sup> )         | 0.533 and -0.441                                                               |

$$R1 = \sum(|F_o| - |F_c|) / \sum|F_o|, wR2 = [\sum w(F_o^2 - F_c^2)^2 / \sum w(F_o^2)^2]^{0.5}.$$

**Table S2.** Selected bond lengths (Å) and angles (°) for **1**.

| Bond lengths | (Å)      | Bond angles     | (°)       | Bond angles     | (°)       |
|--------------|----------|-----------------|-----------|-----------------|-----------|
| Ni(1)-O(2)   | 2.047(2) | O(2)-Ni(1)-O(7) | 91.87(7)  | N(2)-Ni(1)-O(6) | 178.20(8) |
| Ni(1)-O(7)   | 2.077(2) | O(2)-Ni(1)-N(2) | 92.20(9)  | N(1)-Ni(1)-O(6) | 89.55(9)  |
| Ni(1)-N(2)   | 2.079(3) | O(7)-Ni(1)-N(2) | 88.20(9)  | O(2)-Ni(1)-O(5) | 172.39(9) |
| Ni(1)-N(1)   | 2.092(2) | O(2)-Ni(1)-N(1) | 87.73(8)  | O(7)-Ni(1)-O(5) | 84.48(8)  |
| Ni(1)-O(6)   | 2.093(2) | O(7)-Ni(1)-N(1) | 177.92(9) | N(2)-Ni(1)-O(5) | 94.35(10) |
| Ni(1)-O(5)   | 2.112(2) | N(2)-Ni(1)-N(1) | 89.77(10) | N(1)-Ni(1)-O(5) | 96.16(9)  |
|              |          | O(2)-Ni(1)-O(6) | 89.44(7)  | O(6)-Ni(1)-O(5) | 84.07(9)  |
|              |          | O(7)-Ni(1)-O(6) | 92.49(7)  |                 |           |

**Table S3.** Hydrogen bond lengths (Å) and bond angles (°) in **1**.

| D-H...A                         | D-H (Å) | H...A (Å) | D...A (Å) | <D-H...A (°) |
|---------------------------------|---------|-----------|-----------|--------------|
| O5-H5B...O105                   | 0.94    | 1.83      | 2.745(3)  | 164.2        |
| O5-H5C...O6                     | 0.72    | 2.40      | 2.816(3)  | 118.6        |
| O6-H6A...O3                     | 0.89    | 1.88      | 2.754(2)  | 165.6        |
| O6-H6B...O4 <sup>i</sup>        | 0.99    | 1.71      | 2.597(3)  | 147.0        |
| O7-H7A...O1                     | 0.93    | 1.74      | 2.646(3)  | 164.3        |
| O7-H7B...O3 <sup>i</sup>        | 0.94    | 1.83      | 2.751(3)  | 168.5        |
| O101-H10D...O104 <sup>ii</sup>  | 0.85    | 1.98      | 2.830(4)  | 171.9        |
| O101-H10E...O104                | 0.86    | 1.96      | 2.807(4)  | 166.6        |
| O102-H10J...O101 <sup>iii</sup> | 0.84    | 1.96      | 2.793(4)  | 168.4        |
| O102-H10K...O103                | 0.81    | 2.22      | 2.949(4)  | 149.1        |
| O103-H10H...O1                  | 0.97    | 1.87      | 2.742(3)  | 147.8        |
| O103-H10L...O102 <sup>iv</sup>  | 0.93    | 1.92      | 2.815(4)  | 160.9        |
| O104-H10F...O3                  | 0.83    | 1.95      | 2.766(3)  | 169.2        |
| O104-H10G...O105 <sup>v</sup>   | 0.83    | 2.08      | 2.903(3)  | 170.6        |
| O105-H10B...O6 <sup>v</sup>     | 0.82    | 2.04      | 2.851(3)  | 169.8        |
| O105-H10C...O103 <sup>vi</sup>  | 0.89    | 1.93      | 2.814(4)  | 173.4        |
| C20-H20A...O5                   | 0.93    | 2.39      | 3.301(9)  | 167.4        |

Symmetry transformations used to generate equivalent atoms: i) -x+1, -y+1, -z+1; ii) -x+1, -y+1, -z+2; iii) -x+1, -y, -z+1; iv) -x+1, -y, -z; v) -x, -y+1, -z+1; vi) x-1, y, z.
